# Supplementary material for: Influence of stress, temperature and crystal morphology on isothermal densification and specific surface area decrease of new snow
Source: Copernicus journal article supplement (doi:10.5194/tc-8-1825-2014), 2014-10-09
Supplement: Supplementary file 1 [file supplement-cover-letter.pdf › supplement-cover-letter.pdf]

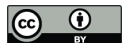

## *Supplement of*

# **Influence of stress, temperature and crystal morphology on isothermal densification and specific surface area decrease of new snow**

**S. Schleef et al.**

*Correspondence to:* H. Löwe (loewe@slf.ch)

- Supplement-Cover-Letter.pdf
- new-snow-metamorphism-settling.avi
